# Supplementary material for: Global model simulations of the impact of ocean-going ships on aerosols, clouds, and the radiation budget
Source: Copernicus journal article supplement (doi:10.5194/acp-7-5061-2007), 2007-10-04
Supplement: Supplementary file 1 [file acp-7-5061-2007-supplement.zip]

# The Chemical Mechanism of MECCA

Rolf Sander & Astrid Kerkweg

sander@mpch-mainz.mpg.de, akerkweg@mpch-mainz.mpg.de

Air Chemistry Department, Max-Planck Institute of Chemistry, PO Box 3060, 55020 Mainz, Germany

(mechanism generated on April 3, 2006)

Table 1: Gas phase reactions

| #     | labels | reaction                                                                          | rate coefficient                                                                         | reference                                                |
|-------|--------|-----------------------------------------------------------------------------------|------------------------------------------------------------------------------------------|----------------------------------------------------------|
| G1000 | StTrG  | $\text{O}_2 + \text{O}(^1\text{D}) \rightarrow \text{O}(^3\text{P}) + \text{O}_2$ | $3.2\text{E-}11 * \text{EXP}(70./\text{temp})$                                           | Sander et al. (2003)                                     |
| G1001 | StTrG  | $\text{O}_2 + \text{O}(^3\text{P}) \rightarrow \text{O}_3$                        | $6.\text{E-}34 * ((\text{temp}/300.) ** (-2.4)) * \text{cair}$                           | Sander et al. (2003)                                     |
| G2100 | StTrG  | $\text{H} + \text{O}_2 \rightarrow \text{HO}_2$                                   | $k_{3\text{rd}}(\text{temp}, \text{cair}, 5.7\text{E-}32, 1.6, 7.5\text{E-}11, 0., 0.6)$ | Sander et al. (2003)                                     |
| G2104 | StTrG  | $\text{OH} + \text{O}_3 \rightarrow \text{HO}_2$                                  | $1.7\text{E-}12 * \text{EXP}(-940./\text{temp})$                                         | Sander et al. (2003)                                     |
| G2105 | StTrG  | $\text{OH} + \text{H}_2 \rightarrow \text{H}_2\text{O} + \text{H}$                | $5.5\text{E-}12 * \text{EXP}(-2000./\text{temp})$                                        | Sander et al. (2003)                                     |
| G2107 | StTrG  | $\text{HO}_2 + \text{O}_3 \rightarrow \text{OH}$                                  | $1.\text{E-}14 * \text{EXP}(-490./\text{temp})$                                          | Sander et al. (2003)                                     |
| G2109 | StTrG  | $\text{HO}_2 + \text{OH} \rightarrow \text{H}_2\text{O}$                          | $4.8\text{E-}11 * \text{EXP}(250./\text{temp})$                                          | Sander et al. (2003)                                     |
| G2110 | StTrG  | $\text{HO}_2 + \text{HO}_2 \rightarrow \text{H}_2\text{O}_2$                      | $k_{\text{H02\_H02}}$                                                                    | Christensen et al. (2002),<br>Kircher and Sander (1984)* |
| G2111 | StTrG  | $\text{H}_2\text{O} + \text{O}(^1\text{D}) \rightarrow 2 \text{OH}$               | $2.2\text{E-}10$                                                                         | Sander et al. (2003)                                     |
| G2112 | StTrG  | $\text{H}_2\text{O}_2 + \text{OH} \rightarrow \text{H}_2\text{O} + \text{HO}_2$   | $2.9\text{E-}12 * \text{EXP}(-160./\text{temp})$                                         | Sander et al. (2003)                                     |
| G3101 | StTrG  | $\text{N}_2 + \text{O}(^1\text{D}) \rightarrow \text{O}(^3\text{P}) + \text{N}_2$ | $1.8\text{E-}11 * \text{EXP}(110./\text{temp})$                                          | Sander et al. (2003)                                     |
| G3103 | StTrGN | $\text{NO} + \text{O}_3 \rightarrow \text{NO}_2 + \text{O}_2$                     | $3.\text{E-}12 * \text{EXP}(-1500./\text{temp})$                                         | Sander et al. (2003)                                     |
| G3106 | StTrGN | $\text{NO}_2 + \text{O}_3 \rightarrow \text{NO}_3 + \text{O}_2$                   | $1.2\text{E-}13 * \text{EXP}(-2450./\text{temp})$                                        | Sander et al. (2003)                                     |
| G3108 | StTrGN | $\text{NO}_3 + \text{NO} \rightarrow 2 \text{NO}_2$                               | $1.5\text{E-}11 * \text{EXP}(170./\text{temp})$                                          | Sander et al. (2003)                                     |
| G3109 | StTrGN | $\text{NO}_3 + \text{NO}_2 \rightarrow \text{N}_2\text{O}_5$                      | $k_{\text{N03\_N02}}$                                                                    | Sander et al. (2003)*                                    |
| G3110 | StTrGN | $\text{N}_2\text{O}_5 \rightarrow \text{NO}_2 + \text{NO}_3$                      | $k_{\text{N03\_N02}} / (3.\text{E-}27 * \text{EXP}(10990./\text{temp}))$                 | Sander et al. (2003)*                                    |
| G3200 | TrG    | $\text{NO} + \text{OH} \rightarrow \text{HONO}$                                   | $k_{3\text{rd}}(\text{temp}, \text{cair}, 7.\text{E-}31, 2.6, 3.6\text{E-}11, 0.1, 0.6)$ | Sander et al. (2003)                                     |
| G3201 | StTrGN | $\text{NO} + \text{HO}_2 \rightarrow \text{NO}_2 + \text{OH}$                     | $3.5\text{E-}12 * \text{EXP}(250./\text{temp})$                                          | Sander et al. (2003)                                     |
| G3202 | StTrGN | $\text{NO}_2 + \text{OH} \rightarrow \text{HNO}_3$                                | $k_{3\text{rd}}(\text{temp}, \text{cair}, 2.\text{E-}30, 3., 2.5\text{E-}11, 0., 0.6)$   | Sander et al. (2003)                                     |
| G3203 | StTrGN | $\text{NO}_2 + \text{HO}_2 \rightarrow \text{HNO}_4$                              | $k_{\text{N02\_H02}}$                                                                    | Sander et al. (2003)                                     |
| G3204 | TrGN   | $\text{NO}_3 + \text{HO}_2 \rightarrow \text{NO}_2 + \text{OH} + \text{O}_2$      | $3.5\text{E-}12$                                                                         | Sander et al. (2003)                                     |

Table 1: Gas phase reactions (... continued)

| #      | labels | reaction                                                                                                                                           | rate coefficient                                                                          | reference                 |
|--------|--------|----------------------------------------------------------------------------------------------------------------------------------------------------|-------------------------------------------------------------------------------------------|---------------------------|
| G3205  | TrG    | $\text{HONO} + \text{OH} \rightarrow \text{NO}_2 + \text{H}_2\text{O}$                                                                             | $1.8\text{E}-11*\text{EXP}(-390./\text{temp})$                                            | Sander et al. (2003)      |
| G3206  | StTrGN | $\text{HNO}_3 + \text{OH} \rightarrow \text{H}_2\text{O} + \text{NO}_3$                                                                            | $k_{\text{HN03\_OH}}$                                                                     | Sander et al. (2003)*     |
| G3207  | StTrGN | $\text{HNO}_4 \rightarrow \text{NO}_2 + \text{HO}_2$                                                                                               | $k_{\text{N02\_H02}}/(2.1\text{E}-27*\text{EXP}(10900./\text{temp}))$                     | Sander et al. (2003)*     |
| G3208  | StTrGN | $\text{HNO}_4 + \text{OH} \rightarrow \text{NO}_2 + \text{H}_2\text{O}$                                                                            | $1.3\text{E}-12*\text{EXP}(380./\text{temp})$                                             | Sander et al. (2003)      |
| G4101  | StTrG  | $\text{CH}_4 + \text{OH} \rightarrow \text{CH}_3\text{O}_2 + \text{H}_2\text{O}$                                                                   | $1.85\text{E}-20*\text{EXP}(2.82*\log(\text{temp})-987./\text{temp})$                     | Atkinson (2003)*          |
| G4102  | TrG    | $\text{CH}_3\text{OH} + \text{OH} \rightarrow \text{HCHO} + \text{HO}_2$                                                                           | $7.3\text{E}-12*\text{EXP}(-620./\text{temp})$                                            | Sander et al. (2003)      |
| G4103a | StTrG  | $\text{CH}_3\text{O}_2 + \text{HO}_2 \rightarrow \text{CH}_3\text{OOH}$                                                                            | $4.1\text{E}-13*\text{EXP}(750./\text{temp})/(1.+1./497.7*\text{EXP}(1160./\text{temp}))$ | Sander et al. (2003)*     |
| G4103b | StTrG  | $\text{CH}_3\text{O}_2 + \text{HO}_2 \rightarrow \text{HCHO} + \text{H}_2\text{O} + \text{O}_2$                                                    | $4.1\text{E}-13*\text{EXP}(750./\text{temp})/(1.+497.7*\text{EXP}(-1160./\text{temp}))$   | Sander et al. (2003)*     |
| G4104  | StTrGN | $\text{CH}_3\text{O}_2 + \text{NO} \rightarrow \text{HCHO} + \text{NO}_2 + \text{HO}_2$                                                            | $2.8\text{E}-12*\text{EXP}(300./\text{temp})$                                             | Sander et al. (2003)      |
| G4105  | TrGN   | $\text{CH}_3\text{O}_2 + \text{NO}_3 \rightarrow \text{HCHO} + \text{HO}_2 + \text{NO}_2$                                                          | $1.3\text{E}-12$                                                                          | Atkinson et al. (1999)    |
| G4106a | StTrG  | $\text{CH}_3\text{O}_2 + \text{CH}_3\text{O}_2 \rightarrow 2 \text{HCHO} + 2 \text{HO}_2$                                                          | $9.5\text{E}-14*\text{EXP}(390./\text{temp})/(1.+1./26.2*\text{EXP}(1130./\text{temp}))$  | Sander et al. (2003)      |
| G4106b | StTrG  | $\text{CH}_3\text{O}_2 + \text{CH}_3\text{O}_2 \rightarrow \text{HCHO} + \text{CH}_3\text{OH}$                                                     | $9.5\text{E}-14*\text{EXP}(390./\text{temp})/(1.+26.2*\text{EXP}(-1130./\text{temp}))$    | Sander et al. (2003)      |
| G4107  | StTrG  | $\text{CH}_3\text{OOH} + \text{OH} \rightarrow .7 \text{CH}_3\text{O}_2 + .3 \text{HCHO} + .3 \text{OH} + \text{H}_2\text{O}$                      | $k_{\text{CH300H\_OH}}$                                                                   | Sander et al. (2003)*     |
| G4108  | StTrG  | $\text{HCHO} + \text{OH} \rightarrow \text{CO} + \text{H}_2\text{O} + \text{HO}_2$                                                                 | $9.52\text{E}-18*\text{EXP}(2.03*\log(\text{temp})+636./\text{temp})$                     | Sivakumaran et al. (2003) |
| G4109  | TrGN   | $\text{HCHO} + \text{NO}_3 \rightarrow \text{HNO}_3 + \text{CO} + \text{HO}_2$                                                                     | $3.4\text{E}-13*\text{EXP}(-1900./\text{temp})$                                           | Sander et al. (2003)*     |
| G4110  | StTrG  | $\text{CO} + \text{OH} \rightarrow \text{H} + \text{CO}_2$                                                                                         | $1.57\text{E}-13 + \text{cair}*3.54\text{E}-33$                                           | McCabe et al. (2001)      |
| G4111  | TrG    | $\text{HCOOH} + \text{OH} \rightarrow \text{HO}_2$                                                                                                 | $4.\text{E}-13$                                                                           | Sander et al. (2003)      |
| G9200  | TrGS   | $\text{SO}_2 + \text{OH} \rightarrow \text{H}_2\text{SO}_4 + \text{HO}_2$                                                                          | $k_{\text{3rd}}(\text{temp}, \text{cair}, 3.\text{E}-31, 3.3, 1.5\text{E}-12, 0., 0.6)$   | Sander et al. (2003)      |
| G9400a | TrGS   | $\text{DMS} + \text{OH} \rightarrow \text{CH}_3\text{SO}_2 + \text{HCHO}$                                                                          | $1.13\text{E}-11*\text{EXP}(-253./\text{temp})$                                           | Atkinson et al. (2003)*   |
| G9400b | TrGS   | $\text{DMS} + \text{OH} \rightarrow \text{DMSO} + \text{HO}_2$                                                                                     | $k_{\text{DMS\_OH}}$                                                                      | Atkinson et al. (2003)*   |
| G9401  | TrGNS  | $\text{DMS} + \text{NO}_3 \rightarrow \text{CH}_3\text{SO}_2 + \text{HNO}_3 + \text{HCHO}$                                                         | $1.9\text{E}-13*\text{EXP}(520./\text{temp})$                                             | Atkinson et al. (2003)    |
| G9402  | TrGS   | $\text{DMSO} + \text{OH} \rightarrow .6 \text{SO}_2 + \text{HCHO} + .6 \text{CH}_3\text{O}_2 + .4 \text{HO}_2 + .4 \text{CH}_3\text{SO}_3\text{H}$ | $1.\text{E}-10$                                                                           | Hynes and Wine (1996)     |
| G9403  | TrGS   | $\text{CH}_3\text{SO}_2 \rightarrow \text{SO}_2 + \text{CH}_3\text{O}_2$                                                                           | $1.9\text{E}13*\text{EXP}(-8661./\text{temp})$                                            | Barone et al. (1995)      |
| G9404  | TrGS   | $\text{CH}_3\text{SO}_2 + \text{O}_3 \rightarrow \text{CH}_3\text{SO}_3$                                                                           | $3.\text{E}-13$                                                                           | Barone et al. (1995)      |
| G9405  | TrGS   | $\text{CH}_3\text{SO}_3 + \text{HO}_2 \rightarrow \text{CH}_3\text{SO}_3\text{H}$                                                                  | $5.\text{E}-11$                                                                           | Barone et al. (1995)      |

\*Notes:

Rate coefficients for three-body reactions are defined via the function `k_3rd(T, M, k0300, n, kinf300, m, fc)`. In the code, the temperature  $T$  is called `temp` and the concentration of “air molecules”  $M$  is called `cair`. Using the auxiliary variables  $k_0(T)$ ,  $k_{\text{inf}}(T)$ , and  $k_{\text{ratio}}$ , `k_3rd` is defined as:

$$k_0(T) = k_0^{300} \times \left( \frac{300\text{K}}{T} \right)^n \quad (1)$$

$$k_{\text{inf}}(T) = k_{\text{inf}}^{300} \times \left( \frac{300\text{K}}{T} \right)^m \quad (2)$$

$$k_{\text{ratio}} = \frac{k_0(T)M}{k_{\text{inf}}(T)} \quad (3)$$

$$\text{k\_3rd} = \frac{k_0(T)M}{1 + k_{\text{ratio}}} \times f_c^{\left( \frac{1}{1 + (\log_{10}(k_{\text{ratio}}))^2} \right)} \quad (4)$$

A similar function, called `k_3rd_iupac` here, is used by Atkinson et al. (2005) for three-body reactions. It has the same function parameters as `k_3rd` and it is defined as:

$$k_0(T) = k_0^{300} \times \left( \frac{300\text{K}}{T} \right)^n \quad (5)$$

$$k_{\text{inf}}(T) = k_{\text{inf}}^{300} \times \left( \frac{300\text{K}}{T} \right)^m \quad (6)$$

$$k_{\text{ratio}} = \frac{k_0(T)M}{k_{\text{inf}}(T)} \quad (7)$$

$$N = 0.75 - 1.27 \times \log_{10}(f_c) \quad (8)$$

$$\text{k\_3rd\_iupac} = \frac{k_0(T)M}{1 + k_{\text{ratio}}} \times f_c^{\left( \frac{1}{1 + (\log_{10}(k_{\text{ratio}})/N)^2} \right)} \quad (9)$$

G1002: path leading to 2 O(<sup>3</sup>P) + O<sub>2</sub> neglected

G01Diag: `k_03s = (1.7E-12*EXP(-940./temp)) * C(KPP_OH) + (1.E-14*EXP(-490./`

`temp)) * C(KPP_HO2) + J_01D * 2.2E-10 * C(KPP_H2O) / ( 3.2E-11*EXP(70./temp)*C(KPP_O2) + 1.8E-11*EXP(110./temp)*C(KPP_N2) + 2.2E-10*0.0001)`

G2108: branching ratio from Hack et al., see note B5 of Sander et al. (2003)

G2110: The rate coefficient is: `k_HO2_HO2 = (1.5E-12*EXP(19./temp)+1.7E-33*EXP(1000./temp)*cair)* (1.+1.4E-21*EXP(2200./temp)*C(KPP_H2O))`. The value for the first (pressure-independent) part is from Christensen et al. (2002), the water term from Kircher and Sander (1984)

G3109: The rate coefficient is: `k_NO3_NO2 = k_3rd(temp, cair, 2.E-30, 4.4, 1.4E-12, 0.7, 0.6)`.

G3110: The rate coefficient is defined as backward reaction divided by equilibrium constant.

G3203: The rate coefficient is: `k_NO2_HO2 = k_3rd(temp, cair, 1.8E-31, 3.2, 4.7E-12, 1.4, 0.6)`.

G3206: The rate coefficient is: `k_HNO3_OH = 2.4E-14 * EXP(460./temp) + 1./ ( 1./ (6.5E-34 * EXP(1335./temp)*cair) + 1./ (2.7E-17 * EXP(2199./temp)) )`

G3207: The rate coefficient is defined as backward reaction divided by equilibrium constant.

G4103: product distribution is from Elrod et al. (2001)

G4107: The rate coefficient is: `k_CH3OOH_OH = 3.8E-12*EXP(200./temp)`

G4109: same temperature dependence assumed as for CH<sub>3</sub>CHO+NO<sub>3</sub>

G4201: product distribution is from von Kuhlmann (2001) (see also Neeb et al. (1998))

G4206: Rate coefficient calculated by von Kuhlmann (pers. comm. 2004) using self reactions of CH<sub>3</sub>OO

and C<sub>2</sub>H<sub>5</sub>OO from Sander et al. (2003) and geometric mean as suggested by Madronich and Calvert (1990) and Kirchner and Stockwell (1996). The product distribution (branching=0.5/0.25/0.25) is calculated by von Kuhlmann (pers. comm. 2004) based on Villenave and Lesclaux (1996) and Tyndall et al. (2001).

G4207: same value as for G4107: CH<sub>3</sub>OOH+OH assumed

G4213: The rate coefficient is: `k_PA_NO2 = k_3rd(temp, cair, 8.5E-29, 6.5, 1.1E-11, 1., 0.6)`.

G4216: 1.0E-11 from Atkinson et al. (1999), temperature dependence from Kirchner and Stockwell (1996)

G4218: same value as for G4107: CH<sub>3</sub>OOH+OH assumed

G4219: according to Pöschl et al. (2000), the same value as for CH<sub>3</sub>CHO+OH can be assumed

G4220: 50% of the upper limit given by Sander et al. (2003), as suggested by von Kuhlmann (2001)

G4221: The rate coefficient is: `k_PAN_M = k_PA_NO2/ 9.E-29*EXP(-14000./temp)`, i.e. the rate coefficient is defined as backward reaction divided by equilibrium constant.

G4301: product distribution is for terminal olefin carbons from Zaveri and Peters (1999)

G4304: The rate coefficient is: `k_PrO2_HO2 = 1.9E-13*EXP(1300./temp)`. Value for generic RO<sub>2</sub> + HO<sub>2</sub> reaction from Atkinson (1997) is used.

G4305: The rate coefficient is: `k_PrO2_NO = 2.7E-12*EXP(360./temp)`

G4306: The rate coefficient is: `k_PrO2_CH3O2 = 9.46E-14*EXP(431./temp)`. The product distribution is from von Kuhlmann (2001).

G4307: same value as for G4107: CH<sub>3</sub>OOH+OH assumed

G4309: products are from von Kuhlmann (2001)

G4315: same value as for G4107:  $\text{CH}_3\text{OOH} + \text{OH}$  assumed

G4319: same value as for PAN assumed

G4401: same value as for propyl group assumed ( $k_{\text{PrO2\_CH3O2}}$ )

G4402: same value as for propyl group assumed ( $k_{\text{PrO2\_H02}}$ )

G4403: same value as for propyl group assumed ( $k_{\text{PrO2\_N0}}$ )

G4404: same value as for G4107:  $\text{CH}_3\text{OOH} + \text{OH}$  assumed

G4409: The factor 0.25 was recommended by Uli Poeschl (pers. comm. 2004).

G4414: same value as for propyl group assumed ( $k_{\text{PrO2\_H02}}$ )

G4415: same value as for propyl group assumed ( $k_{\text{PrO2\_N0}}$ )

G4416: same value as for G4107:  $\text{CH}_3\text{OOH} + \text{OH}$  assumed

G4417: value for  $\text{C}_4\text{H}_9\text{ONO}_2$  used here

G4503: same temperature dependence assumed as for other  $\text{RO}_2 + \text{HO}_2$  reactions

G4504: Yield of 12 %  $\text{RONO}_2$  assumed as suggested in Table 2 of Sprengnether et al. (2002).

G6102: The rate coefficient is:  $k_{\text{C10\_C10}} = k_{\text{3rd\_iupac}}(\text{temp}, \text{cair}, 2.\text{E-}32, 4., 1.\text{E-}11, 0., 0.45)$ .

G6103: The rate coefficient is defined as backward reaction divided by equilibrium constant.

G6204: At low temperatures, there may be a minor reaction channel leading to  $\text{O}_3 + \text{HCl}$ . See Finkbeiner et al. (1995) for details. It is neglected here.

G6405: average of reactions with  $\text{CH}_3\text{Br}$  and  $\text{CH}_3\text{F}$  (B. Steil, pers. comm., see also note A15 in Sander et al. (2003)).

G6407: extrapolated from reactions with  $\text{CH}_3\text{CF}_3$ ,  $\text{CH}_3\text{CClF}_2$ , and  $\text{CH}_3\text{CCl}_2\text{F}$  (B. Steil, pers. comm., see also note A15 in Sander et al. (2003)).

G7302: The rate coefficient is:  $k_{\text{BrO\_N02}} = k_{\text{3rd}}(\text{temp}, \text{cair}, 5.2\text{E-}31, 3.2, 6.9\text{E-}12, 2.9, 0.6)$ .

G7303: The rate coefficient is defined as backward reaction (Sander et al., 2003) divided by equilibrium constant (Orlando and Tyndall, 1996).

G8101: This value was assumed by Jimenez et al. (2003).

G8102: The product as well as the reaction were assumed by von Glasow et al. (2002). An alternative pathway is the formation of new particles. This reaction needs to be updated when laboratory measurements become available.

G8103: product distribution is from Bloss et al. (2001)

G8203: assumed (J. Crowley, pers. comm. 2004)

G8300: The rate coefficient is:  $k_{\text{I\_N02}} = k_{\text{3rd}}(\text{temp}, \text{cair}, 3.\text{E-}31, 1., 6.6\text{E-}11, 0., 0.6)$ .

G8304: J. Moldanova and J. Plane, pers. comm.

G8305: The rate coefficient is defined as backward reaction (Sander et al., 2003) divided by equilibrium constant (van den Bergh and Troe, 1976).

G8306: Note that in an earlier study by Jenkin et al. (1985), a value of  $5\text{E-}3 \text{ s}^{-1}$  was assumed.

G8600: Turnipseed et al. (1997) found a branching ratio of 14% for the sum of channels which do not produce I atoms. We assume that  $\text{OIO}$  and  $\text{C1}$  are produced in this case.

G8701: Gilles et al. (1997) found an upper limit of 35% for I atom production. We assume 35% I and 65%  $\text{OIO}$  as products. See also Rowley et al. (2001) for info about products.

G9400a: Abstraction path. The assumed reaction sequence (omitting  $\text{H}_2\text{O}$  and  $\text{O}_2$  as products) according to Yin et al. (1990) is:

$$\begin{array}{lcl} \text{DMS} + \text{OH} & \rightarrow & \text{CH}_3\text{SCH}_2 \\ \text{CH}_3\text{SCH}_2 + \text{O}_2 & \rightarrow & \text{CH}_3\text{SCH}_2\text{OO} \\ \text{CH}_3\text{SCH}_2\text{OO} + \text{NO} & \rightarrow & \text{CH}_3\text{SCH}_2\text{O} + \text{NO}_2 \\ \text{CH}_3\text{SCH}_2\text{O} & \rightarrow & \text{CH}_3\text{S} + \text{HCHO} \\ \text{CH}_3\text{S} + \text{O}_3 & \rightarrow & \text{CH}_3\text{SO} \\ \text{CH}_3\text{SO} + \text{O}_3 & \rightarrow & \text{CH}_3\text{SO}_2 \\ \hline \text{DMS} + \text{OH} + \text{NO} + 2\text{O}_3 & \rightarrow & \text{CH}_3\text{SO}_2 + \text{HCHO} + \text{NO}_2 \end{array}$$

Neglecting the effect on  $\text{O}_3$  and  $\text{NO}_x$ , the remaining reaction is:

$$\text{DMS} + \text{OH} + \text{O}_3 \rightarrow \text{CH}_3\text{SO}_2 + \text{HCHO}$$

G9400b: Addition path. The rate coefficient is:  $k_{\text{DMS\_OH}} = 1.0\text{E-}39 * \text{EXP}(5820./\text{temp}) * \text{C}(\text{KPP\_O2}) / (1. + 5.0\text{E-}30 * \text{EXP}(6280./\text{temp}) * \text{C}(\text{KPP\_O2}))$ .

Table 2: Photolysis reactions

| #      | labels  | reaction                                                                                                  | rate coefficient | reference |
|--------|---------|-----------------------------------------------------------------------------------------------------------|------------------|-----------|
| J1001a | StTrGJ  | $\text{O}_3 + h\nu \rightarrow \text{O}(^1\text{D})$                                                      | J_01D            | see note  |
| J1001b | StTrGJ  | $\text{O}_3 + h\nu \rightarrow \text{O}(^3\text{P})$                                                      | J_03P            | see note  |
| J2101  | StTrGJ  | $\text{H}_2\text{O}_2 + h\nu \rightarrow 2 \text{OH}$                                                     | J_H202           | see note  |
| J3101  | StTrGNJ | $\text{NO}_2 + h\nu \rightarrow \text{NO} + \text{O}(^3\text{P})$                                         | J_N02            | see note  |
| J3103a | StTrGNJ | $\text{NO}_3 + h\nu \rightarrow \text{NO}_2 + \text{O}(^3\text{P})$                                       | J_N020           | see note  |
| J3103b | StTrGNJ | $\text{NO}_3 + h\nu \rightarrow \text{NO}$                                                                | J_N002           | see note  |
| J3104  | StTrGNJ | $\text{N}_2\text{O}_5 + h\nu \rightarrow \text{NO}_2 + \text{NO}_3$                                       | J_N205           | see note  |
| J3200  | TrGJ    | $\text{HONO} + h\nu \rightarrow \text{NO} + \text{OH}$                                                    | J_H0N0           | see note  |
| J3201  | StTrGNJ | $\text{HNO}_3 + h\nu \rightarrow \text{NO}_2 + \text{OH}$                                                 | J_HN03           | see note  |
| J3202  | StTrGNJ | $\text{HNO}_4 + h\nu \rightarrow .667 \text{NO}_2 + .667 \text{HO}_2 + .333 \text{NO}_3 + .333 \text{OH}$ | J_HN04           | see note  |
| J4100  | StTrGJ  | $\text{CH}_3\text{OOH} + h\nu \rightarrow \text{HCHO} + \text{OH} + \text{HO}_2$                          | J_CH300H         | see note  |
| J4101a | StTrGJ  | $\text{HCHO} + h\nu \rightarrow \text{H}_2 + \text{CO}$                                                   | J_COH2           | see note  |
| J4101b | StTrGJ  | $\text{HCHO} + h\nu \rightarrow \text{H} + \text{CO} + \text{HO}_2$                                       | J_CHOH           | see note  |

\*Notes: J-values are calculated with an external module and then supplied to the MECCA chemistry

J6100: Stimpfle et al. (2004) claim that the combination of absorption cross sections from Burkholder et al. (1990) and the  $\text{Cl}_2\text{O}_2$  formation rate coefficient by Sander et al. (2003) can approximately reproduce the observed  $\text{Cl}_2\text{O}_2/\text{ClO}$  ratios and ozone depletion. They give an almost zenith-angle independent ratio of 1.4 for Burkholder et al. (1990) to Sander et al. (2003) J-values. The IUPAC recommendation for the  $\text{Cl}_2\text{O}_2$  formation rate is about 5 to 15 % less than the value by Sander et al. (2003) but more than 20 % larger than the value by Sander et al. (2000). The J-values by Burkholder et al. (1990) are within the uncertainty range of the IUPAC recommendation.

Table 3: Heterogeneous reactions

| # | labels | reaction | rate coefficient | reference |
|---|--------|----------|------------------|-----------|
|---|--------|----------|------------------|-----------|

\*Notes:

The forward (`k_exf`) and backward (`k_exb`) rate coefficients are calculated in the file `messy_mecca_mbl.f90` using the accommodation coefficients in subroutine `mecca_mbl_alpha` and Henry's law constants in subroutine `mecca_mbl_henry`.

$k_{\text{mt}}$  = mass transfer coefficient

`lwc` = liquid water content of aerosol mode

H3201, H6300, H6301, H6302, H7300, H7301, H7302, H7601, H7602: For uptake of  $X$  ( $= \text{N}_2\text{O}_5$ ,  $\text{ClNO}_3$ ,  $\text{BrNO}_3$ ) and subsequent reaction with  $\text{H}_2\text{O}$ ,  $\text{Cl}^-$ , and  $\text{Br}^-$ , we define  $k_{\text{exf}}(X) = k_{\text{mt}}(X) \times lwc / ([\text{H}_2\text{O}] + 5.0E2[\text{Cl}^-] + 3.0E5[\text{Br}^-])$ .

H6301, H6302, H7601: The total uptake is determined

by  $k_{\text{mt}}(\text{ClNO}_3)$ . The relative rates are assumed to be the same as for  $\text{N}_2\text{O}_5$  (H3201, H6300, H7300).

H7301, H7302, H7602: The total uptake is determined by  $k_{\text{mt}}(\text{BrNO}_3)$ . The relative rates are assumed to be the same as for  $\text{N}_2\text{O}_5$  (H3201, H6300, H7300).

Table 4: PSC reactions

| # | labels | reaction | rate coefficient | reference |
|---|--------|----------|------------------|-----------|
|---|--------|----------|------------------|-----------|

\*Notes: PSC reaction rates are calculated with an external module and then supplied to the MECCA chemistry (see <http://www.messy-interface.org> for details)

Table 5: Acid-base and other equilibria

| # | labels | reaction | $K_0[M^{m-n}]$ | $-\Delta H/R[K]$ | reference |
|---|--------|----------|----------------|------------------|-----------|
|---|--------|----------|----------------|------------------|-----------|

\*Notes:

EQ82 and EQ83: Thermodynamic calculations on the IBr/ICl equilibrium according to the data tables from Wagman et al. (1982):

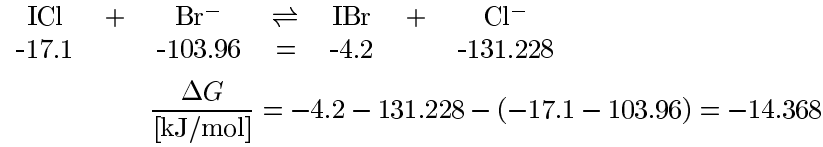

$$K = \frac{[\text{IBr}] \times [\text{Cl}^-]}{[\text{ICl}] \times [\text{Br}^-]} = \exp\left(\frac{-\Delta G}{RT}\right) = \exp\left(\frac{14368}{8.314 \times 298}\right) = 330$$

This means we have equal amounts of IBr and ICl when the [Cl<sup>-</sup>]/[Br<sup>-</sup>] ratio equals 330.



Table 6: Aqueous phase reactions

| #      | labels                                                                                                                                                                                                                                                                                                                                                                                                 | reaction                                                                                                                 | $k_0$ [ $M^{1-n}s^{-1}$ ] | $-E_a/R[K]$ | reference |
|--------|--------------------------------------------------------------------------------------------------------------------------------------------------------------------------------------------------------------------------------------------------------------------------------------------------------------------------------------------------------------------------------------------------------|--------------------------------------------------------------------------------------------------------------------------|---------------------------|-------------|-----------|
| A6102: | Jacobi (1996)                                                                                                                                                                                                                                                                                                                                                                                          | found an upper limit of 6E9 and cite an upper limit from another study of 2E9. Here, we set the rate coefficient to 1E9. |                           |             |           |
| A6301: | There is also an earlier study by Exner et al. (1992) which found a smaller rate coefficient but did not consider the back reaction.                                                                                                                                                                                                                                                                   |                                                                                                                          |                           |             |           |
| A7400: | assumed to be the same as for $\text{Br}_2^- + \text{H}_2\text{O}_2$ .                                                                                                                                                                                                                                                                                                                                 |                                                                                                                          |                           |             |           |
| A9106: | see also: (Huie and Neta, 1987; Warneck, 1991). If this reaction produces a lot of $\text{SO}_4^-$ , it will have an effect. However, we currently assume only the stable $\text{S}_2\text{O}_8^{2-}$ as product. Since $\text{S}_2\text{O}_8^{2-}$ is not treated explicitly in the mechanism, we use $\text{SO}_4^{2-}$ as a proxy. Note that this destroys the mass consistency for sulfur species. |                                                                                                                          |                           |             |           |
| A9205: | D. Sedlak, pers. comm. (1993)                                                                                                                                                                                                                                                                                                                                                                          |                                                                                                                          |                           |             |           |
| A9208: | D. Sedlak, pers. comm. (1993)                                                                                                                                                                                                                                                                                                                                                                          |                                                                                                                          |                           |             |           |
| A9105: | The rate coefficient for the sum of the paths (leading to either $\text{HSO}_5^-$ or $\text{SO}_4^{2-}$ ) is from Huie and Neta (1987), the ratio 0.28/0.72 is from Deister and Warneck (1990).                                                                                                                                                                                                        |                                                                                                                          |                           |             |           |
| A9605: | assumed to be the same as for $\text{SO}_3^{2-} + \text{HOCl}$ .                                                                                                                                                                                                                                                                                                                                       |                                                                                                                          |                           |             |           |
| A9705: | assumed to be the same as for $\text{SO}_3^{2-} + \text{HOBr}$ .                                                                                                                                                                                                                                                                                                                                       |                                                                                                                          |                           |             |           |

## References

- Atkinson, R.: Gas-phase tropospheric chemistry of volatile organic compounds: 1. Alkanes and alkenes, *J. Phys. Chem. Ref. Data*, 26, 215–290, 1997.
- Atkinson, R.: Kinetics of the gas-phase reactions of OH radicals with alkanes and cycloalkanes, *Atmos. Chem. Phys.*, 3, 2233–2307, 2003.
- Atkinson, R., Baulch, D. L., Cox, R. A., Hampson, Jr., R. F., Kerr, J. A., Rossi, M. J., and Troe, J.: Summary of evaluated kinetic and photochemical data for atmospheric chemistry: Web version August 1999, <http://www.iupac-kinetic.ch.cam.ac.uk/>, 1999.
- Atkinson, R., Baulch, D. L., Cox, R. A., Crowley, J. N., Hampson, R. F., Hynes, R. G., Jenkin, M. E., Rossi, M. J., and Troe, J.: Evaluated kinetic and photochemical data for atmospheric chemistry: Part 1 - gas phase reactions of O<sub>x</sub>, HO<sub>x</sub>, NO<sub>x</sub> and SO<sub>x</sub> species, *Atmos. Chem. Phys. Discuss.*, 3, 6179–6699, 2003.
- Atkinson, R., Baulch, D. L., Cox, R. A., Crowley, J. N., Hampson, Jr., R. F., Hynes, R. G., Jenkin, M. E., Kerr, J. A., Rossi, M. J., and Troe, J.: Summary of evaluated kinetic and photochemical data for atmospheric chemistry: Web version March 2005, <http://www.iupac-kinetic.ch.cam.ac.uk/>, 2005.
- Barone, S. B., Turnipseed, A. A., and Ravishankara, A. R.: Role of adducts in the atmospheric oxidation of dimethyl sulfide, *Faraday Discuss.*, 100, 39–54, 1995.
- Bloss, W. J., Rowley, D. M., Cox, R. A., and Jones, R. L.: Kinetics and products of the IO self-reaction, *J. Phys. Chem. A*, 105, 7840–7854, 2001.
- Burkholder, J. B., Orlando, J. J., and Howard, C. J.: Ultraviolet absorption cross sections of Cl<sub>2</sub>O<sub>2</sub> between 210 and 410 nm, *J. Phys. Chem.*, 94, 687–695, 1990.
- Christensen, L. E., Okumura, M., Sander, S. P., Salawitch, R. J., Toon, G. C., Sen, B., Blavier, J.-F., and Jucks, K. W.: Kinetics of HO<sub>2</sub> + HO<sub>2</sub> → H<sub>2</sub>O<sub>2</sub> + O<sub>2</sub>: Implications for stratospheric H<sub>2</sub>O<sub>2</sub>, *Geophys. Res. Lett.*, 29, doi:10.1029/2001GL014525, 2002.
- Deister, U. and Warneck, P.: Photooxidation of SO<sub>3</sub><sup>2-</sup> in aqueous solution, *J. Phys. Chem.*, 94, 2191–2198, 1990.
- Elrod, M. J., Ranschaert, D. L., and Schneider, N. J.: Direct kinetics study of the temperature dependence of the CH<sub>2</sub>O branching channel for the CH<sub>3</sub>O<sub>2</sub> + HO<sub>2</sub> reaction, *Int. J. Chem. Kinetics*, 33, 363–376, 2001.
- Exner, M., Herrmann, H., and Zellner, R.: Laser-based studies of reactions of the nitrate radical in aqueous solution, *Ber. Bunsenges. Phys. Chem.*, 96, 470–477, 1992.
- Finkbeiner, M., Crowley, J. N., Horie, O., Müller, R., Moortgat, G. K., and Crutzen, P. J.: Reaction between HO<sub>2</sub> and ClO: Product formation between 210 and 300 K, *J. Phys. Chem.*, 99, 16264–16275, 1995.
- Gilles, M. K., Turnipseed, A. A., Burkholder, J. B., Ravishankara, A. R., and Solomon, S.: Kinetics of the IO radical. 2. Reaction of IO with BrO, *J. Phys. Chem. A*, 101, 5526–5534, 1997.
- Huie, R. E. and Neta, P.: Rate constants for some oxidations of S(IV) by radicals in aqueous solutions, *Atmos. Environ.*, 21, 1743–1747, 1987.
- Hynes, A. J. and Wine, P. H.: The atmospheric chemistry of dimethylsulfoxide (DMSO) kinetics and mechanism of the OH + DMSO reaction, *J. Atmos. Chem.*, 24, 23–37, 1996.
- Jacobi, H.-W.: Kinetische Untersuchungen und Modellrechnungen zur troposphärischen Chemie von Radikalanionen und Ozon in wässriger Phase, Ph.D. thesis, Universität GH Essen, FRG, 1996.
- Jenkin, M. E., Cox, R. A., and Candeland, D. E.: Photochemical aspects of tropospheric iodine behaviour, *J. Atmos. Chem.*, 2, 359–375, 1985.
- Jimenez, J. L., Bahreini, R., Cocker III, D. R., Zhuang, H., Varutbangkul, V., Flagan, R. C., Seinfeld, J. H., O'Dowd, C. D., and Hoffmann, T.: New particle formation from photooxidation of diiodomethane (CH<sub>2</sub>I<sub>2</sub>), *J. Geophys. Res.*, 108D, doi:10.1029/2002JD002452, 2003.
- Kircher, C. C. and Sander, S. P.: Kinetics and mechanism of HO<sub>2</sub> and DO<sub>2</sub> disproportionations, *J. Phys. Chem.*, 88, 2082–2091, 1984.
- Kirchner, F. and Stockwell, W. R.: Effect of peroxy radical reactions on the predicted concentrations of ozone, nitrogenous compounds, and radicals, *J. Geophys. Res.*, 101D, 21007–21022, 1996.
- Madronich, S. and Calvert, J. G.: Permutation reactions of organic peroxy radicals in the troposphere, *J. Geophys. Res.*, 95D, 5697–5715, 1990.
- McCabe, D. C., Gierczak, T., Talukdar, R. K., and Ravishankara, A. R.: Kinetics of the reaction OH + CO under atmospheric conditions, *Geophys. Res. Lett.*, 28, 3135–3138, 2001.
- Neeb, P., Horie, O., and Moortgat, G. K.: The ethene-ozone reaction in the gas phase, *J. Phys. Chem. A*, 102, 6778–6785, 1998.

- Orlando, J. J. and Tyndall, G. S.: Rate coefficients for the thermal decomposition of  $\text{BrONO}_2$  and the heat of formation of  $\text{BrONO}_2$ , *J. Phys. Chem.*, 100, 19 398–19 405, 1996.
- Pöschl, U., von Kuhlmann, R., Poisson, N., and Crutzen, P. J.: Development and intercomparison of condensed isoprene oxidation mechanisms for global atmospheric modeling, *J. Atmos. Chem.*, 37, 29–52, 2000.
- Rowley, D. M., Bloss, W. J., Cox, R. A., and Jones, R. L.: Kinetics and products of the  $\text{IO} + \text{BrO}$  reaction, *J. Phys. Chem. A*, 105, 7855–7864, 2001.
- Sander, S. P., Friedl, R. R., DeMore, W. B., Golden, D. M., Kurylo, M. J., Hampson, R. F., Huie, R. E., Moortgat, G. K., Ravishankara, A. R., Kolb, C. E., and Molina, M. J.: Chemical kinetics and photochemical data for use in stratospheric modeling. Supplement to evaluation 12: Update of key reactions. Evaluation number 13, JPL Publication 00-3, Jet Propulsion Laboratory, Pasadena, CA, <http://jpldataeval.jpl.nasa.gov/>, 2000.
- Sander, S. P., Finlayson-Pitts, B. J., Friedl, R. R., Golden, D. M., Huie, R. E., Kolb, C. E., Kurylo, M. J., Molina, M. J., Moortgat, G. K., Orkin, V. L., and Ravishankara, A. R.: Chemical Kinetics and Photochemical Data for Use in Atmospheric Studies, Evaluation Number 14, JPL Publication 02-25, Jet Propulsion Laboratory, Pasadena, CA, 2003.
- Sivakumaran, V., Hölscher, D., Dillon, T. J., and Crowley, J. N.: Reaction between  $\text{OH}$  and  $\text{HCHO}$ : temperature dependent rate coefficients (202–399 K) and product pathways (298 K), *Phys. Chem. Chem. Phys.*, 5, 4821–4827, 2003.
- Sprengnether, M., Demerjian, K. L., Donahue, N. M., and Anderson, J. G.: Product analysis of the  $\text{OH}$  oxidation of isoprene and 1,3-butadiene in the presence of  $\text{NO}$ , *J. Geophys. Res.*, 107D, doi:10.1029/2001JD000716, 2002.
- Stimpfle, R. M., Wilmouth, D. M., Salawitch, R. J., and Anderson, J. G.: First measurements of  $\text{ClOOCl}$  in the stratosphere: The coupling of  $\text{ClOOCl}$  and  $\text{ClO}$  in the Arctic polar vortex, *J. Geophys. Res.*, 109, doi:10.1029/2003JD003811, 2004.
- Turnipseed, A. A., Gilles, M. K., Burkholder, J. B., and Ravishankara, A. R.: Kinetics of the  $\text{IO}$  radical. 1. Reaction of  $\text{IO}$  with  $\text{ClO}$ , *J. Phys. Chem. A*, 101, 5517–5525, 1997.
- Tyndall, G. S., Cox, R. A., Granier, C., Lesclaux, R., Moortgat, G. K., Pilling, M. J., Ravishankara, A. R., and Wallington, T. J.: The atmospheric chemistry of small organic peroxy radicals, *J. Geophys. Res.*, 106D, 12 157–12 182, 2001.
- van den Bergh, H. and Troe, J.: Kinetic and thermodynamic properties of  $\text{INO}$  and  $\text{INO}_2$  intermediate complexes in iodine recombination, *J. Chem. Phys.*, 64, 736–742, 1976.
- Villenave, E. and Lesclaux, R.: Kinetics of the cross reactions of  $\text{CH}_3\text{O}_2$  and  $\text{C}_2\text{H}_5\text{O}_2$  radicals with selected peroxy radicals, *J. Phys. Chem.*, 100, 14 372–14 382, 1996.
- von Glasow, R., Sander, R., Bott, A., and Crutzen, P. J.: Modeling halogen chemistry in the marine boundary layer. 1. Cloud-free MBL, *J. Geophys. Res.*, 107D, 4341, doi:10.1029/2001JD000942, 2002.
- von Kuhlmann, R.: Tropospheric photochemistry of ozone, its precursors and the hydroxyl radical: A 3D-modeling study considering non-methane hydrocarbons, Ph.D. thesis, Johannes Gutenberg-Universität, Mainz, Germany, 2001.
- Wagman, D. D., Evans, W. H., Parker, V. B., Schumm, R. H., Halow, I., Bailey, S. M., Churney, K. L., and Nuttall, R. L.: The NBS tables of chemical thermodynamic properties; Selected values for inorganic and  $\text{C}_1$  and  $\text{C}_2$  organic substances in SI units, *J. Phys. Chem. Ref. Data*, 11, suppl. 2, 1982.
- Warneck, P.: Chemical reactions in clouds, *Fresenius J. Anal. Chem.*, 340, 585–590, 1991.
- Yin, F., Grosjean, D., and Seinfeld, J. H.: Photooxidation of dimethyl sulfide and dimethyl disulfide. I: Mechanism development, *J. Atmos. Chem.*, 11, 309–364, 1990.
- Zaveri, R. A. and Peters, L. K.: A new lumped structure photochemical mechanism for large-scale applications, *J. Geophys. Res.*, 104D, 30 387–30 415, 1999.
